# Supplementary material
Source: PubMed Central journal article supplement (PMC5939047)
Supplement: 41422_2018_15_MOESM1_ESM.pdf [file 41422_2018_15_MOESM1_ESM.pdf]

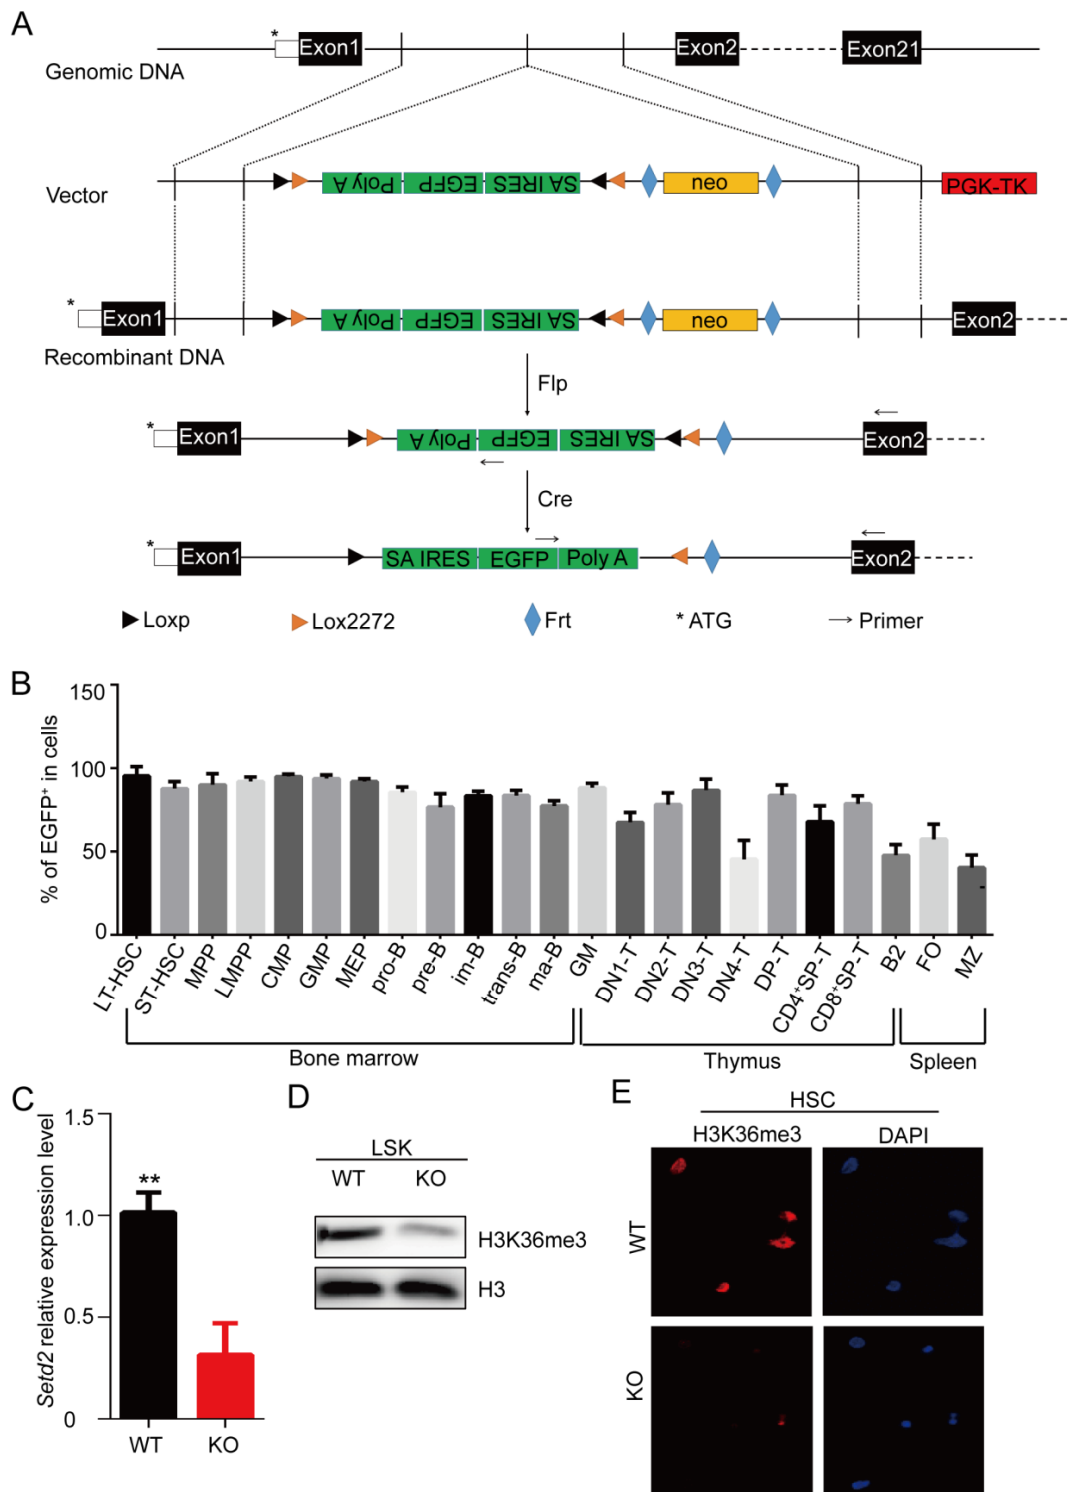

**Figure S1. *Setd2* can be effectively deleted in hematopoietic stem cells (HSCs).**

(A) The Schema diagram of the construction of *Setd2* conditional knock-out mouse model. (B) Percentage of EGFP positive cells in KO BM, spleen and thymus hematopoietic compartments. (C) RT-qPCR detection of *Setd2* expression in WT and KO LSKs. (D) Western blot detection of H3K36me3 modification in WT and KO LSKs. H3 was used as a loading control. (E) Immunofluorescence detection of H3K36me3 modification in HSCs.
