# Supplementary material
Source: PubMed Central journal article supplement (PMC5939047)
Supplement: 41422_2018_15_MOESM2_ESM.pdf [file 41422_2018_15_MOESM2_ESM.pdf]

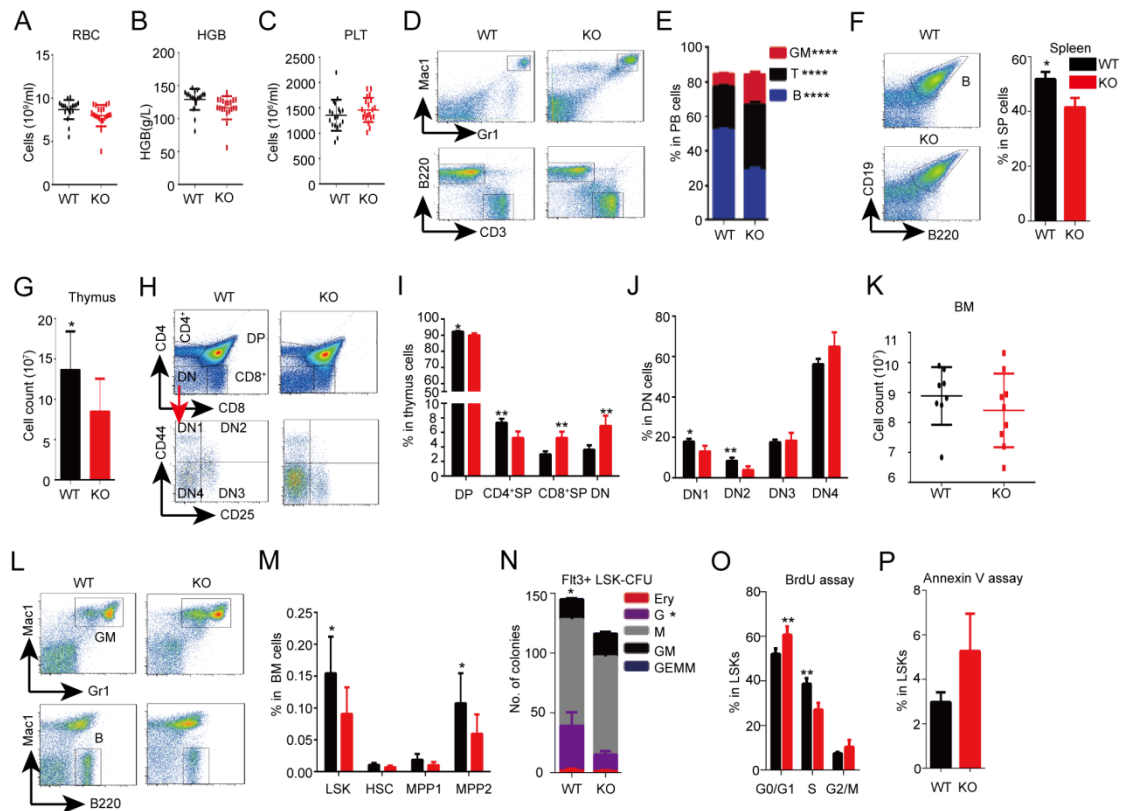

**Figure S2. *Setd2* deficiency skews the differentiation balance between lymphoid and myeloid cells in mice at 4 weeks after pi-pC induction.**

(A-C) Routine blood test of WT (n=18) and KO (n=19) mice. (D) Representative FACS analysis of WT and KO peripheral blood (PB) lineage cells. (E) Statistical comparison of PB cell lineages between WT (n=18) and KO (n=19) mice. (F) The comparison of B cell population between WT and KO spleen. WT=4, KO=6. (G) Cell counting analysis of total thymus cells in WT (n=4) or KO (n=6) mice. (H) Representative FACS analysis of T cell subsets in WT or KO thymus. (I) Statistical comparison of different T cell subsets in total thymus between WT (n=4) and KO (n=6) mice. (J) Proportion analysis of different subsets of double-negative (DN) T cell in thymus. WT=4, KO=6. (K) Cell counting analysis of total BM cells from bilateral femurs and tibias of WT (n=8) or KO (n=9) mice. (L) Representative FACS analysis of WT and KO BM mature lineages. (M) Proportion analysis of HSPC subsets in WT (n=8) and KO (n=9) BM. (N) Colony-forming unit (CFU) assay of BM FLT3<sup>+</sup>-LSKs. n=3. (O-P) BrdU and Annexin V assay of LSKs which were from d4 in vitro culture of BM FLT3-LSK cells. n=3. \*P<0.05, \*\*P<0.01, \*\*\*P<0.001, \*\*\*\*P<0.0001.
