# Supplementary material
Source: PubMed Central journal article supplement (PMC5939047)
Supplement: 41422_2018_15_MOESM5_ESM.pdf [file 41422_2018_15_MOESM5_ESM.pdf]

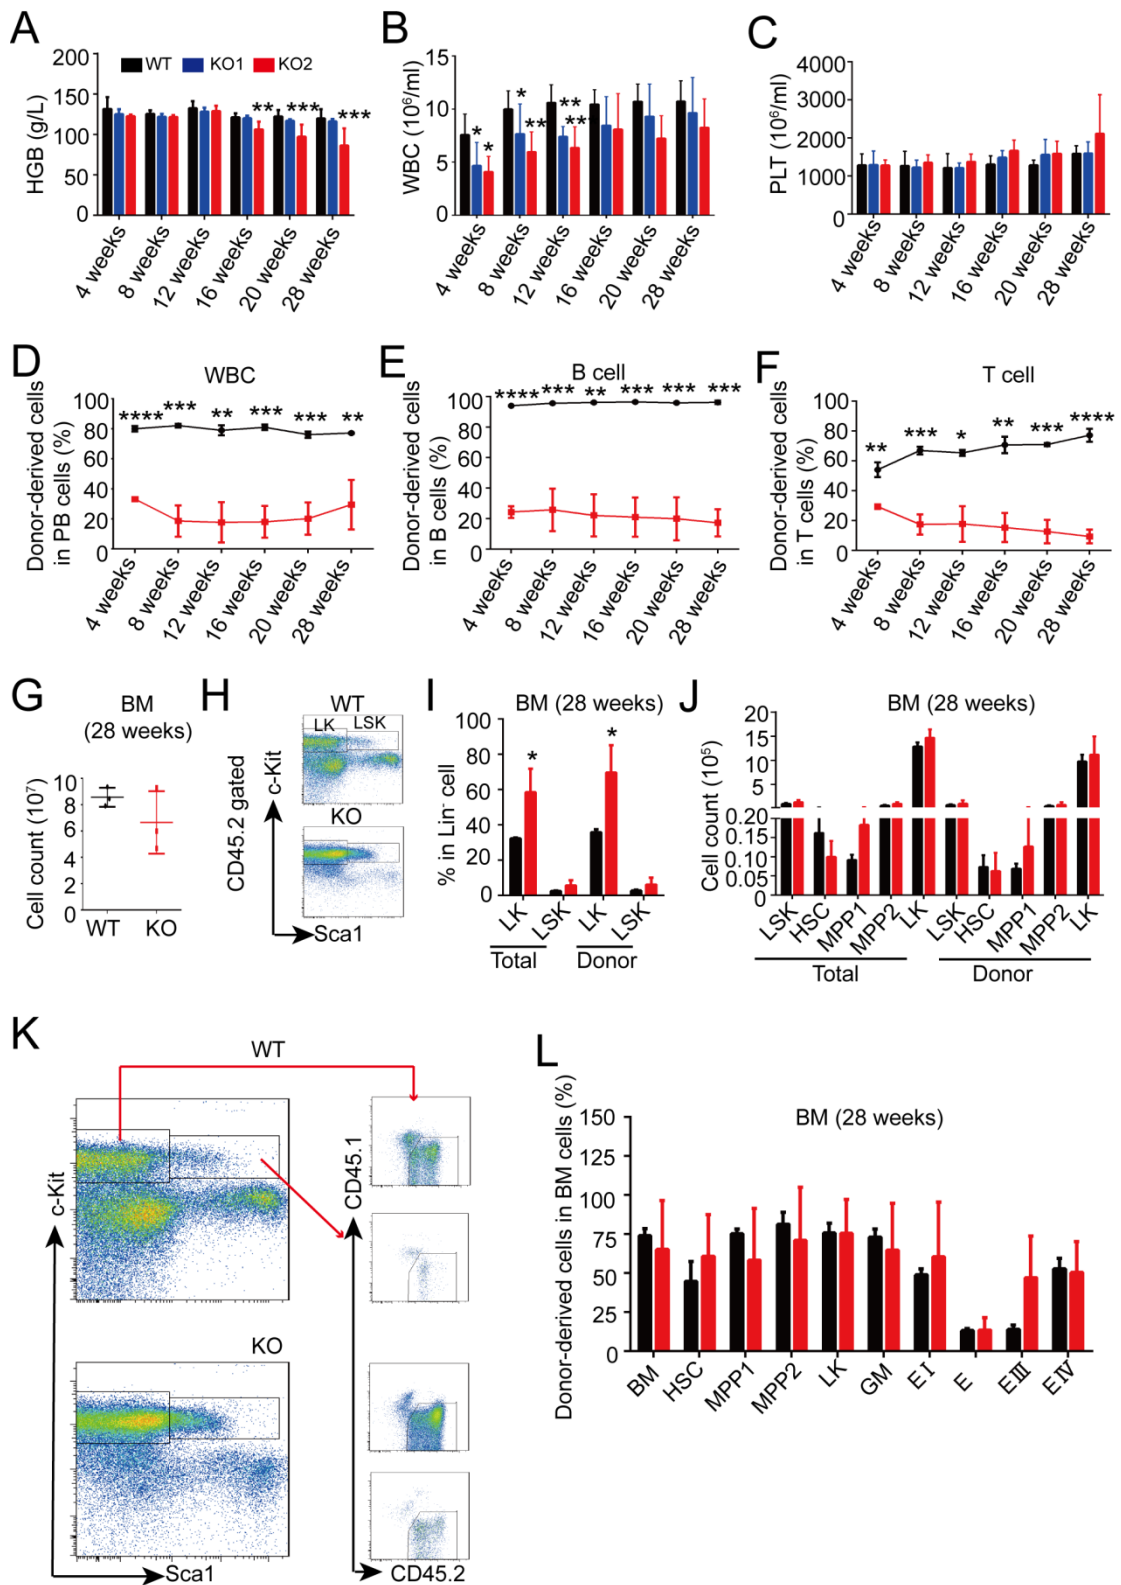

**Figure S5. MDS-like disease caused by long-term *Setd2* deficiency is reproducible in primary ncBMT mice.**

(A-C) Follow-up of the routine blood test at indicated time points. WT=10; KO1 =6; KO2 =4. (D-F) Proportion analysis of donor-derived cells in different PB cell lineages. WT=10, KO2=4. (G) The absolute cell count of total BM cells in ncBMT mice at 28

weeks after pl-pC induction. n=3. (H) Representative FACS analysis of LK and LSK proportion in donor-derived BM Lin<sup>-</sup> cells. (I) Statistical analysis of LK and LSK proportion in total and donor-derived BM Lin<sup>-</sup> cells. n=3. (J) The absolute cell count of HSPCs in total or donor-derived BM cells. n=3. (K) Representative FACS analysis of donor-derived cells in BM LK and LSK. (L) Proportion analysis of donor-derived cells in different BM subsets. n=3. \*P<0.05, \*\*P<0.01, \*\*\*P<0.001, \*\*\*\*P<0.0001.
